# Supplementary material for: First Evidence of Function for Schistosoma japonicumriok-1 and RIOK-1
Source: MDPI journal article supplement (doi:10.3390/pathogens10070862), 2021-07-08
Supplement: s1 [file s1]

**Table S1.** DNA sequences of oligonucleotide primers used in the present study. These primers were employed for the isolation of 3'cDNA of *Sj-riok-1* and for the amplification of DNA template for dsRNA synthesis of *Sj-riok-1*, non-specific *egfp* genes using PCR-based approaches and for real-time (RT) PCR quantification.

| Name                    | Primer Sequence (5'-3')                          |
|-------------------------|--------------------------------------------------|
| Riok1-F                 | TGAAGAACGAGAAGCAGATGA                            |
| Riok1-R                 | GCTGGTAGACACGGAGGATT                             |
| Riok1-ORF-F             | ATGAAGAACGAGAAGCAGAT                             |
| Riok1-ORF-R             | GGTGTCACTACTTTTTATTTTAC                          |
| Riok1-qPCR-F            | GTTTCTCAGCCTGTTCTTGC                             |
| Riok1-qPCR-R            | GCTGGTGATACTCCCTTTTT                             |
| Egfp-qpCR-F             | ATGGTGAGCAAGGGCGAGGA                             |
| Egfp-qpCR-R             | GTGGTTGTCGGGCAGCAGCA                             |
| $\beta$ -Tubulin-qPCR-F | GCGGGACAGTGTGGTAATCA                             |
| $\beta$ -Tubulin-qPCR-R | ATGCGTTCAAGTTGTAAATCAGAG                         |
| dsRNA-riok1-F           | <u>TAATACGACTCACTATAGGGTGAAGAACGAGAAGCAGATGA</u> |
| dsRNA-riok1-R           | <u>TAATACGACTCACTATAGGGGCTGGTAGACACGGAGGATT</u>  |
| dsRNA-egfp-F            | <u>TAATACGACTCACTATAGGGATGGTGAGCAAGGGCGAGGA</u>  |
| dsRNA-egfp-R            | <u>TAATACGACTCACTATAGGGGTGGTTGTCGGGCAGCAGC</u>   |

<sup>a</sup> underscore represents T7 promotor site.

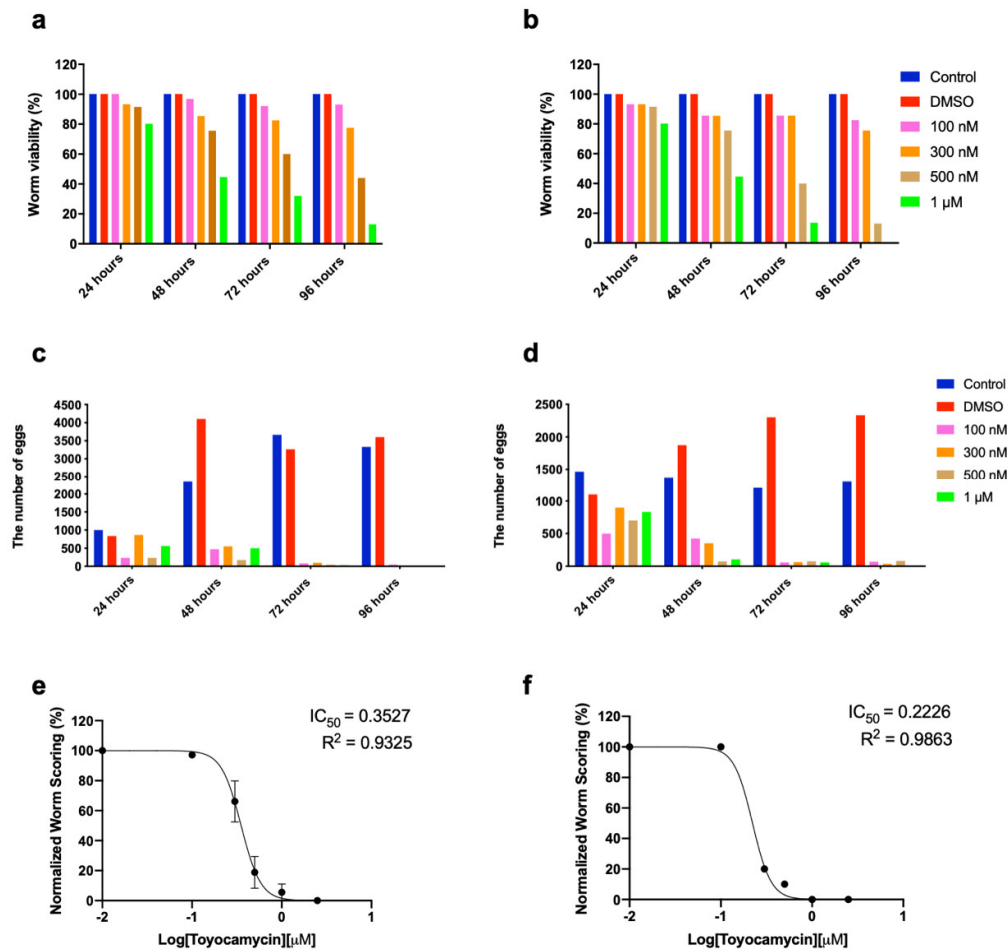

**Figure S1.** Preliminary data of toyocamycin on viability and egg production of 35-do and 28-do adult worms of *Schistosoma japonicum*. (a,c) Effect of toyocamycin treatment between 24 h and 96 h on viability and egg production of 35-do worms. (b,d) Effect of toyocamycin treatment between 24 h and 96 h on viability and egg production of 28-do worms. (e,f)  $IC_{50}$  value for worm viability scoring in response to toyocamycin at 96 h of 35-do and 28-do adult worms, respectively. Data without error bars represents  $n = 1$ .
